# Supplementary material for: Convergent Transcription Induces Dynamic DNA Methylation at disiRNA Loci
Source: PubMed Central journal article supplement (PMC3764098; doi:10.1371/journal.pgen.1003761), 2013-09-05
Supplement: pgen.1003761.s005.pdf [file pgen.1003761.s005.pdf]

*disi-47* (C=112)

BfuCI treated (73%)

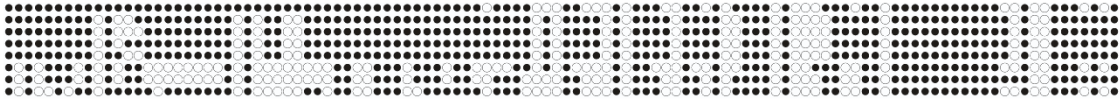

untreated (~0%)

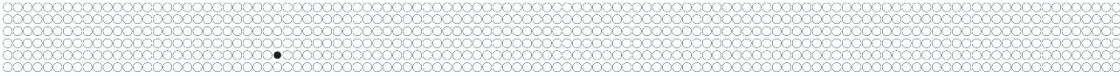

*disi-29* (C=78)

BfuCI treated (73%)

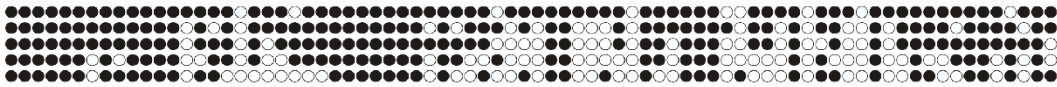

untreated (~0%)

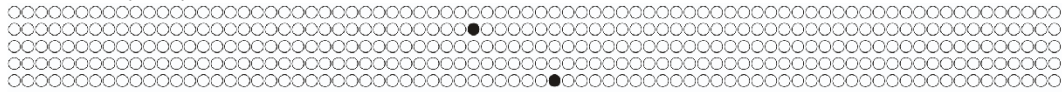

Figure S5
