# Supplementary material for: Convergent Transcription Induces Dynamic DNA Methylation at disiRNA Loci
Source: PubMed Central journal article supplement (PMC3764098; doi:10.1371/journal.pgen.1003761), 2013-09-05
Supplement: pgen.1003761.s009.pdf [file pgen.1003761.s009.pdf]

Table S1:

| qPCR primer pairs for disiRNA-6 locus        |                           |
|----------------------------------------------|---------------------------|
| d6-1f                                        | CGATTTGACGGCATTACTGGA     |
| d6-1r                                        | AGGCTCGTCAACGGAGTCTTC     |
| d6-2f                                        | GCCGTTTTCTCAACGTCTGT      |
| d6-2r                                        | GGCAAGGATGGCCTATGTTA      |
| d6-3f                                        | CATCACCCTTCGTCAGCAGAG     |
| d6-3r                                        | AGCCTGACTGCTGTACGAAAGG    |
| d6-4f                                        | CAGCGCCAAGTTTGACAGAA      |
| d6-4r                                        | CTGGACCACAGCATTCTGT       |
| d6-5f                                        | GATTGTCAAGCCGTTCTCGT      |
| d6-5r                                        | CCTGTGTTTCCGGATGAAGT      |
| d6-6f                                        | AATCGACTTCTCCAGCTCGT      |
| d6-6r                                        | CCGTACTIONTATCCAGGTGAGGC  |
| d6-7f                                        | GCGTGTAGCACTCCAACTGA      |
| d6-7r                                        | ATCTCTGAAGGCAGGCAGTG      |
| d6-8f                                        | CCGTGTGTGAAAGAACCAGA      |
| d6-8r                                        | GTGCGAAGCTAGATGGTGTGG     |
| d6-9f                                        | ATTGTGGAGGATGGGGATAGG     |
| d6-9r                                        | CTGTTTGGTGCGTGTCTTCCT     |
| qPCR primer pairs for disiRNA-29 locus       |                           |
| d29-1f                                       | CCTCGGATTTCTTTCACCTCTCTT  |
| d29-1r                                       | TACCTAGGCTGGGGCTCCTTTT    |
| d29-2f                                       | TGCACGCTATGGGAGTGTGT      |
| d29-2r                                       | CGCCGGAGAAAGATTGTGAT      |
| d29-3f                                       | AAAACATGTGGACGGTACGC      |
| d29-3r                                       | GGAAGGTCCAGACTGACGAC      |
| d29-4f                                       | GGACGCGGGTACATTACAAA      |
| d29-4r                                       | GCTGGTGCTTGCTGGTACTT      |
| d29-5f                                       | TCCCTATGGGCTGTTCTCAG      |
| d29-5r                                       | CTTTGCGGTAGCTTCTCCAC      |
| d29-6f                                       | GATAGGGGACGATGGGTGTA      |
| d29-6r                                       | CGTTCAAGCATGAAGGGTCT      |
| d29-7f                                       | AGTTACGGTCACCTTTGGTATCGAG |
| d29-7r                                       | AGCCCAAAGTGCCTCATGTCA     |
| d29-8f                                       | ATTATGTGTGGCTTCTGTGCG     |
| d29-8r                                       | TTTTGGAGCAAGCCAACCCT      |
| disiRNA-47 primer pairs for disiRNA-47 locus |                           |
| d47-1f                                       | GATAGAGAGAAACAATGGCTGCTTC |
| d47-1r                                       | GGGGGGAGAACTCACCAATTA     |
| d47-2f                                       | GACTCCAACGAGCTTGTTCATCA   |
| d47-2r                                       | CGGCACCAAATTGCTGTC        |
| d47-3f                                       | CAGAACCAACTTGGCGGTGAT     |
| d47-3r                                       | TTGACCTTGGTCGGGCAA        |
| d47-4f                                       | ACCAATGGATGGATGGCCTAC     |
| d47-4r                                       | TTAGCCTAACGTGACGCATGC     |
| d47-5f                                       | CAGTGAAAAAGAGGCTCGCTG     |
| d47-5r                                       | CACGCCGAATAGAATCCAGAG     |

|                                          |                         |
|------------------------------------------|-------------------------|
| d47-6f                                   | TCCTGTCTCGTTGCTTTCTCC   |
| d47-6r                                   | CAGGCGCTGATTAACGTGTTC   |
| d47-7f                                   | CCCCGTGTTTCTCCAAGTAA    |
| d47-7r                                   | TGGGAATGGCTTGTACACA     |
| d47-8f                                   | TGTGGGACGTTGCTCGATAG    |
| d47-8r                                   | TCTCGCTCGGTCATTGATTG    |
| d47-9f                                   | CTACACAGAAACACACCCGCA   |
| d47-9r                                   | AAAGTACACGACTACCCCGAGG  |
| d47-10f                                  | CTACACAGAAACACACCCGCA   |
| d47-10r                                  | CCCTGGGGTTTCCTTTGGA     |
| d47-11f                                  | TCCAAAGGAAACCCAGGG      |
| d47-11r                                  | GGTGGATGGGGAAAAAAGGA    |
| d47-12f                                  | TGTGTCGAGATTCCCTCCTC    |
| d47-12r                                  | CTCTCCCGCTCATGTTTGT     |
| d47-13f                                  | GTTCCGCCAAGTTCGGTTT     |
| d47-13r                                  | CGAAAGAACCGTTCCTCAA     |
| d47-14f                                  | AAGCGGTTTGTGTTTTGGA     |
| d47-14r                                  | CCGGGCGGGAAATATAAAAA    |
| d47-15f                                  | CGCTTCCCAAATTGACCAA     |
| d47-15r                                  | GGCGCTACCTTTCTGGTTC     |
| d47-16f                                  | ACGCAACCCTCTCCCTTCTC    |
| d47-16r                                  | ATTCCGAAGACGGCCGATAC    |
| qPCR primer pairs for other disiRNA loci |                         |
| disiRNA-23f                              | CTTCATCGCACTCAACGAAA    |
| disiRNA-23r                              | GCTTCTGGTACATGCCACCT    |
| disiRNA-35f                              | AATATCGAGTTTGGGCAACG    |
| disiRNA-35r                              | CTCCCTGGTTCTCAGCAGAC    |
| disiRNA-42f                              | TCACCGACGAATTTACCATCC   |
| disiRNA-42r                              | GTTGAGATCGCCAACCTGAGG   |
| disiRNA-48f                              | ATGTTCTGGTTCTTCTCTGCCG  |
| disiRNA-48r                              | TCAACCAACCACCATCACTCC   |
| disiRNA-49f                              | GTGGTGCCTCTACTTGTTCCGGT |
| disiRNA-49r                              | CGCCTTTATGAACGGAATGG    |
| disiRNA-8f                               | CTGGGAACACCACTGGAACA    |
| disiRNA-8r                               | ATTGGTGAGGTGGGATCCTG    |
| disiRNA-9f                               | GGCACCTCGTGGTTGTTGTA    |
| disiRNA-9r                               | CTCCAGCAATTGAGCGTCTG    |
| disiRNA-12f                              | GGTCAAGGTGGGTTTGAAGG    |
| disiRNA-12r                              | CAGCAAGTCGCAGGCTACC     |
| disiRNA-22f                              | TGCCAGTTGTACCGGTGAAG    |
| disiRNA-22r                              | AGTCTTGGCCCAGAGCAGAC    |
| disiRNA-28f                              | GGCCAGATGGATCCTACGAC    |
| disiRNA-28r                              | GGGGTCGTCTGTGAAAGGAG    |
| disiRNA-34f                              | CACTCTGGCCTTTTCCTTCTC   |
| disiRNA-34r                              | AGCTCGACGTCAACCAGAGAC   |
| disiRNA-39f                              | TGACAACTGAGGGCACACAT    |
| disiRNA-39r                              | GCCGTAAAGCTCCATAGCTG    |
| disiRNA-42f                              | GTTGAGATCGCCAACCTGAGG   |
| disiRNA-42r                              | TCACCGACGAATTTACCATCC   |

|                             |                        |
|-----------------------------|------------------------|
| disiRNA-50f                 | TATCGCGACTTCCCTCCTTC   |
| disiRNA-50r                 | TGAACGCTCATTTCCTCGTTA  |
| <b>control primer pairs</b> |                        |
| am f                        | CGGTTACCGTGTCCAGTTCA   |
| am r                        | CTAGAGACGCCGAGTCAGCA   |
| Al-1 f                      | GCGATACCACGACAACACCA   |
| Al-1 r                      | GGACCGTTCGGAGAGAAAAC   |
| 113-114 f                   | CAAAGAAGTCATGGAGCCCTCT |
| 113-114 r                   | CGAGCATCACAAAATGGTCG   |
| ncu06312f                   | CATGACTTGCCGCCAAGCT    |
| ncu06312r                   | ATGTTTCGGGAGGTCCCTTT   |
| ζ-η f                       | ACACTTAGGATTGCTAATCGTC |
| ζ-η r                       | GTACGATCCTATCGGCTTAC   |
