# Supplementary material for: Convergent Transcription Induces Dynamic DNA Methylation at disiRNA Loci
Source: PubMed Central journal article supplement (PMC3764098; doi:10.1371/journal.pgen.1003761), 2013-09-05
Supplement: pgen.1003761.s010.pdf [file pgen.1003761.s010.pdf]

Table S2:

| primer pairs for Southern blotting probes |                                           |
|-------------------------------------------|-------------------------------------------|
| am f                                      | CGGTTACCGTGTCCAGTTCA                      |
| am 3r                                     | GCAAGGAAGAGCGATGTCAA                      |
| d29-5f                                    | TCCCTATGGGCTGTTCTCAG                      |
| d29-6r                                    | CGTTCAAGCATGAAGGGTCT                      |
| d47-8f                                    | TGTGGGACGTTGCTCGATAG                      |
| d47-11r                                   | GGTGGATGGGGAAAAAAGGA                      |
| ζ-η probe r                               | AAA CCA TRT RCC CCA AAC CAC TCT           |
| ζ-η probe f                               | GTT ATT GTA TAT YGA TAG GGA GAG<br>AYY GG |
