# Supplementary material for: Convergent Transcription Induces Dynamic DNA Methylation at disiRNA Loci
Source: PubMed Central journal article supplement (PMC3764098; doi:10.1371/journal.pgen.1003761), 2013-09-05
Supplement: pgen.1003761.s011.pdf [file pgen.1003761.s011.pdf]

Table S3:

|                            |                                            |
|----------------------------|--------------------------------------------|
| disiRNA-6                  |                                            |
| ds6(+f1)                   | GGT GTT GYA TTC TGG GAA AGY TTG            |
| ds6(+f2)                   | GGA TTT TGA GGG YAG YAG AYG GAG            |
| ds6(+r2)                   | CTT AAC CCT TTT CTC TTA RAC CTR CRT C      |
| ds6(+r1)                   | CAA CCC CAC CTA CCT CTT CAT C              |
| disiRNA-29                 |                                            |
| d29(+f1)                   | GTA YGG AGT ATT GGY TGG YTG TG             |
| d29(+f2)                   | GGT TGG YYG GTY GTT GTT GTA AG             |
| d29(+r1)                   | CTC RAT ARC CTRACC CCT TTC TCC             |
| d29(+r2)                   | CAT CAC CAC CAC ATC CRT CRA C              |
| disiRNA-47                 |                                            |
| d47(-)f1                   | AAC TTT TCR ATC CRC TCR ATC CCC T          |
| d47(-)r1                   | GGT ATT GYG ATA TGG GYA GAG TTG G          |
| d47(-)f2                   | CTT RCC CTC CCT CCC CTT TCC AC             |
| d47(-)r2                   | GTY YAG TTG AGG GTA TAG TGT TGG AAG        |
| control primers: am locus  |                                            |
| am(+f1)                    | GTA GGT TTA TAA GGG TAY GTY TGA GAG A      |
| am(+f2)                    | GTG TTG TTT GGG AGG AYG AYA AYG            |
| am(+r2)                    | CCT TAC CAA TAA RRA CAC CCT CRA AAC        |
| am(+r1)                    | CTC AAC CTC CTC CTT RRA AAC CTCA           |
| control primers: al-1 gene |                                            |
| al-1(+f1)                  | GTG YAG AGA GAA GGA GYG AYG ATA AG         |
| al-1(+f2)                  | GAA GGT YGA GAT YGA AAA GTG GGA AG         |
| al-1(+r2)                  | CTT RAC RCC CAT CCT CTC TCC AA             |
| al-1(+r1)                  | CAC CTC RCC RTT CTC AAR CTR RAC AC         |
| control primers: ζ-η       |                                            |
| ζ-η (+)f1                  | GAA GAA AGG AAG AAA AYA AAG AGA AAY<br>YGA |
| ζ-η (+)f2                  | GTT ATT GTA TAT YGA TAG GGA GAG AYY<br>GG  |
| ζ-η (+)r1                  | CTA TCT CRC CCA ART CRA ARC CTC            |
| ζ-η (+)r2                  | CCC TCC RCT AAC CCT TAT TAC TAT TAC        |
