# Supplementary material for: Convergent Transcription Induces Dynamic DNA Methylation at disiRNA Loci
Source: PubMed Central journal article supplement (PMC3764098; doi:10.1371/journal.pgen.1003761), 2013-09-05
Supplement: pgen.1003761.s012.pdf [file pgen.1003761.s012.pdf]

Table S4:

| qPCR primers      |                                 |
|-------------------|---------------------------------|
| 1f                | TCATGAACGCCGGTAGTGTC            |
| 1r                | TCTGTGAAGCGGGGCTATTT            |
| 2f                | GGGAGTGTGGGAAATGGTGT            |
| 2r                | AACTATGCGGCATCAGAGCA            |
| 3f                | GCATCTTACGGATGGCATGA            |
| 3r                | CGTCGTTTGGTATGGCTTCA            |
| 4f                | TTTCGCCACCTCTGACTTGA            |
| 4r                | CAGGGGATAACGCAGGAAAG            |
| 5f                | AACATCCGTGCAATGCAGAC            |
| 5r                | AACCGTTGGAAAGCGAAGAA            |
| 6f                | GATCATGTCCGGCTACGTCA            |
| 6r                | GTGCTGGAGGAGGATGGACT            |
| 7f                | TCGGGCATCTTCACAACAAC            |
| 7r                | GAGGGAGTTCTCGGAGCAGA            |
| 8f                | CCCTTAATCGGCAATCGAGA            |
| 8r                | ATCCGCGTTGGGATTATGAC            |
| 9f                | TGTGTGCTTCATTCCCTCCTT           |
| 9r                | TGGCATTGTTGTTGCTGAATC           |
| 10f               | CGACCCTGGATCTCGCTTAC            |
| 10r               | CTAAGCCCCTCCATTCTTG             |
| bisulfite primers |                                 |
| qa(-) 1f          | TCT CAT RAC CAA AAT CCC TTA AC  |
| qa(-) 2f          | TCC ACT AAA CAT CAR ACC CCR TA  |
| qa(-) 1r          | GGG AAG TGT GGT GTT TTY TYA ATG |
| qa(-) 2r          | GTT TGT TTT AAG YTG GGY TGT GTG |
