# Supplementary material for: Convergent Transcription Induces Dynamic DNA Methylation at disiRNA Loci
Source: PLOS journal article supplement (doi:10.1371/journal.pgen.1003761), 2013-09-05
Supplement: S6 (10.1371/journal.pgen.1003761.s006) [file journal.pgen.1003761.s006]

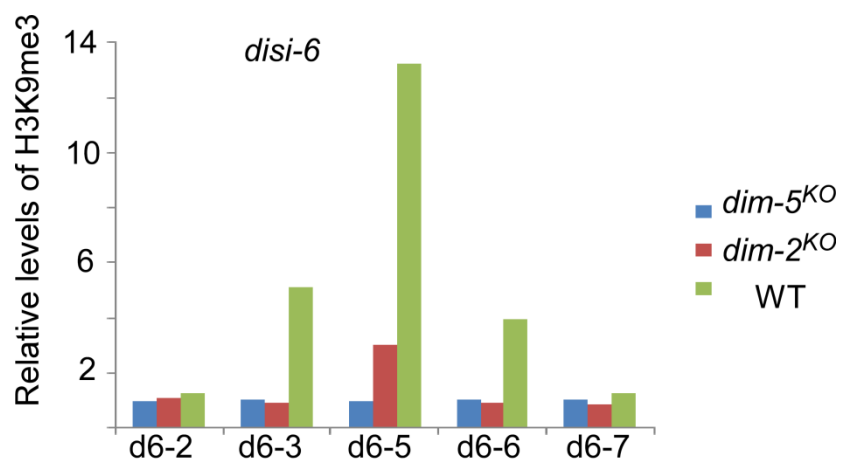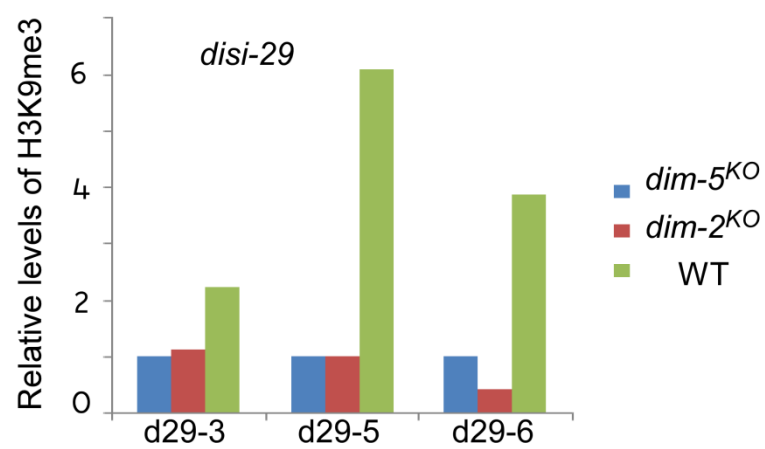

Figure S6
